# Supplementary material for: Enhanced Activity and Sustained Release of Protocatechuic Acid, a Natural Antibacterial Agent, from Hybrid Nanoformulations with Zinc Oxide Nanoparticles
Source: MDPI journal article supplement (doi:10.3390/ijms22105287), 2021-05-18
Supplement: s1 [file s1]

## *Supplementary Materials*

### *Article*

# **Enhanced activity and sustained release of protocatechuic acid, a natural antibacterial agent, from hybrid nanoformulations with zinc oxide nanoparticles**

**Khaled AbouAitah<sup>1,2\*</sup>, Urszula Piotrowska<sup>3</sup>, Jacek Wojnarowicz<sup>1</sup>, Anna Swiderska-Sroda<sup>1</sup>, Ahmed H.H. El-Desoky<sup>4</sup> and Witold Lojkowski<sup>1\*</sup>**

- <sup>1</sup> Laboratory of Nanostructures and Nanomedicine, Institute of High Pressure Physics, Polish Academy of Sciences, Sokolowska 29/37, 01-142, Warsaw, Poland; e-mail: k.abouaitah@labnano.pl (K.A.); jacek.wojnarowicz@tlen.pl (J.W.); a.swiderska-sroda@labnano.pl (A.S.-S.); w.lojkowski@labnano.pl (W.L.).
- <sup>2</sup> Medicinal and Aromatic Plants Research Department, Pharmaceutical and Drug Industries Research Division, National Research Centre (NRC), P.C.12622, Dokki, Giza, Egypt; e-mail: k.abouaitah@nrc.sci.eg (K.A.)
- <sup>3</sup> Department of Biomaterials Chemistry, Chair of Analytical Chemistry and Biomaterials, Faculty of Pharmacy, Medical University of Warsaw, 1 Banacha St., 02-097, Warsaw, Poland, e-mail: upiotrowska@wum.edu.pl (U.P)
- <sup>4</sup> Pharmacognosy Department, Pharmaceutical Industries Research Division, National Research Centre, Dokki, P.O. 12622, Giza, Egypt
- <sup>\*</sup> Correspondence: k.abouaitah@labnano.pl (K.A.); w.lojkowski@labnano.pl (W.L.); Tel.: +48-22-888-0429 or +48-22-632-4302 (K.A. & W.L.); Fax: +48-22-632-4218(K.A. & W.L.)

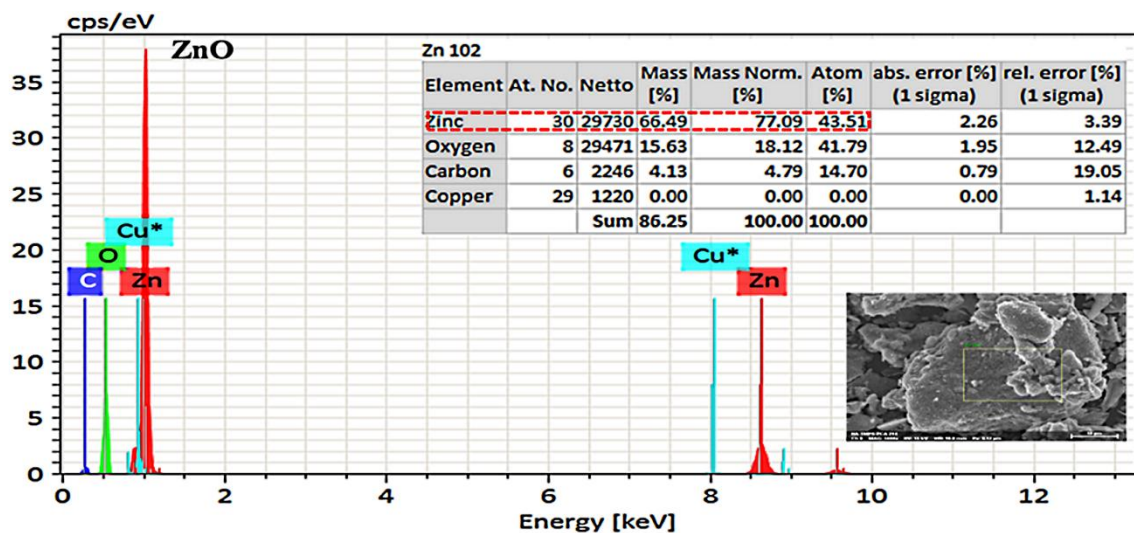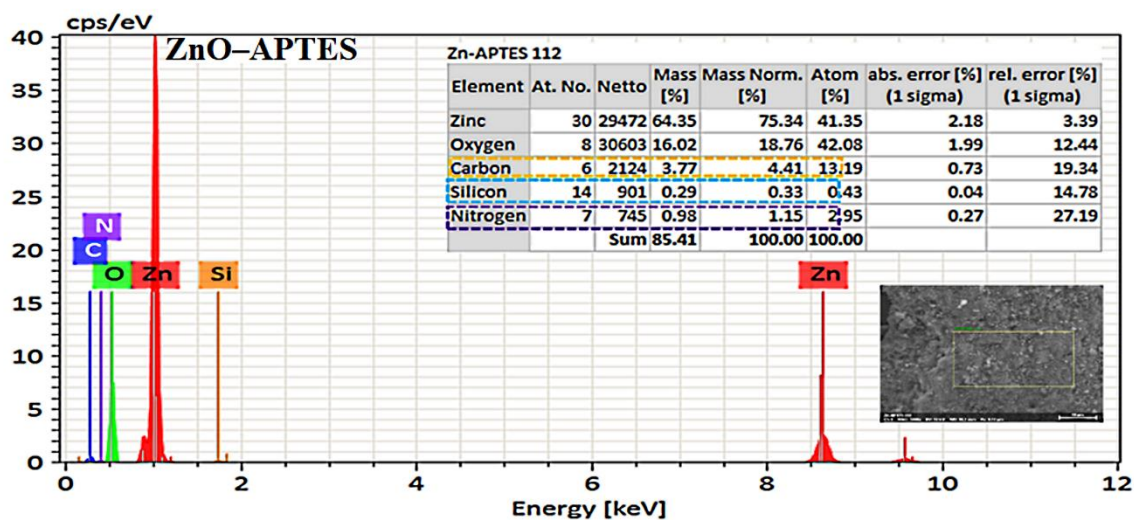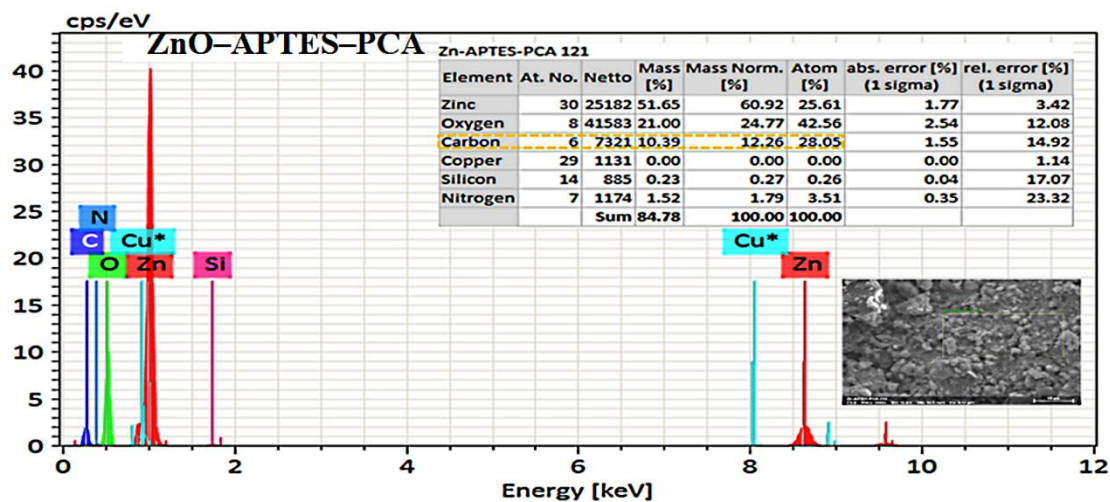

Continued

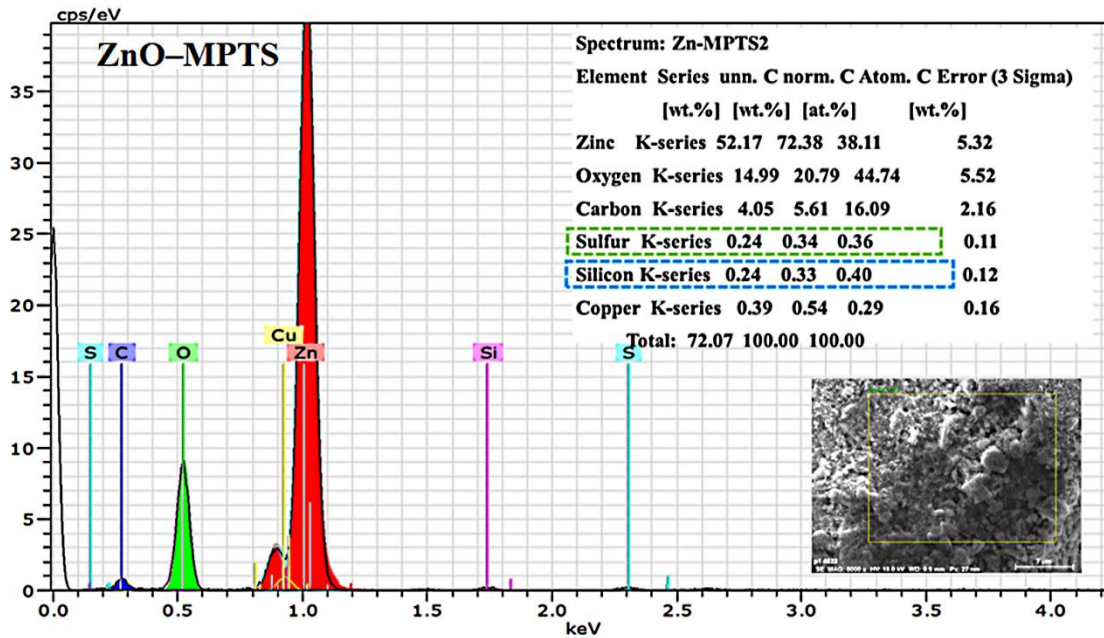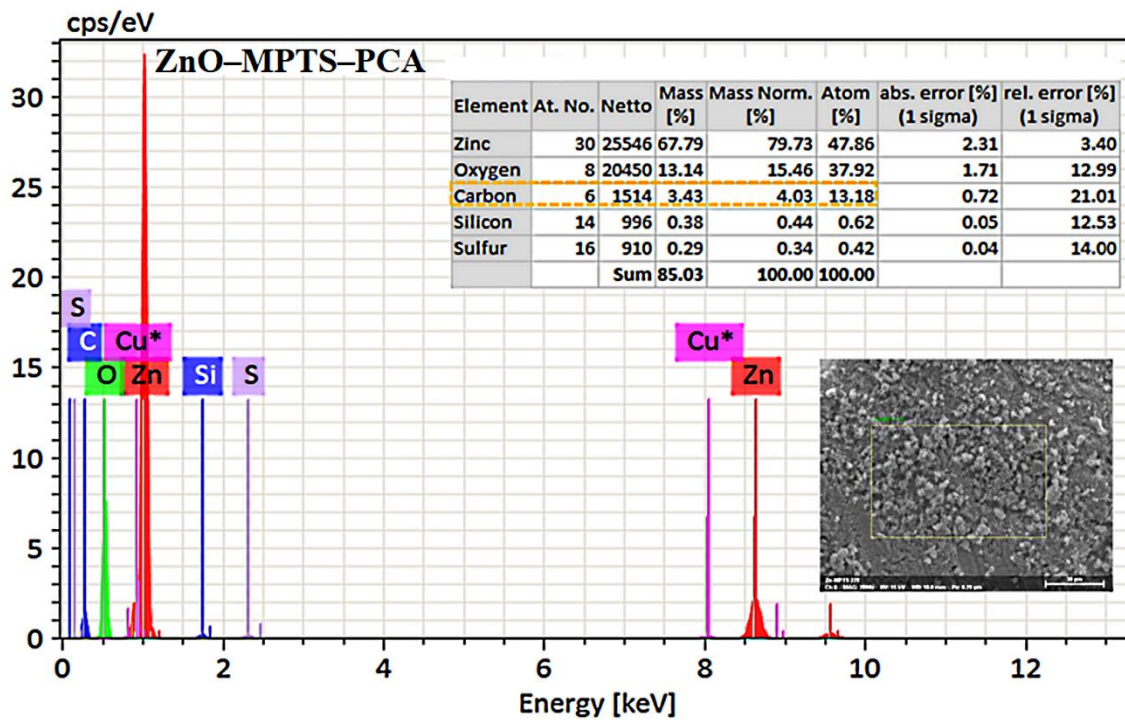

Continued

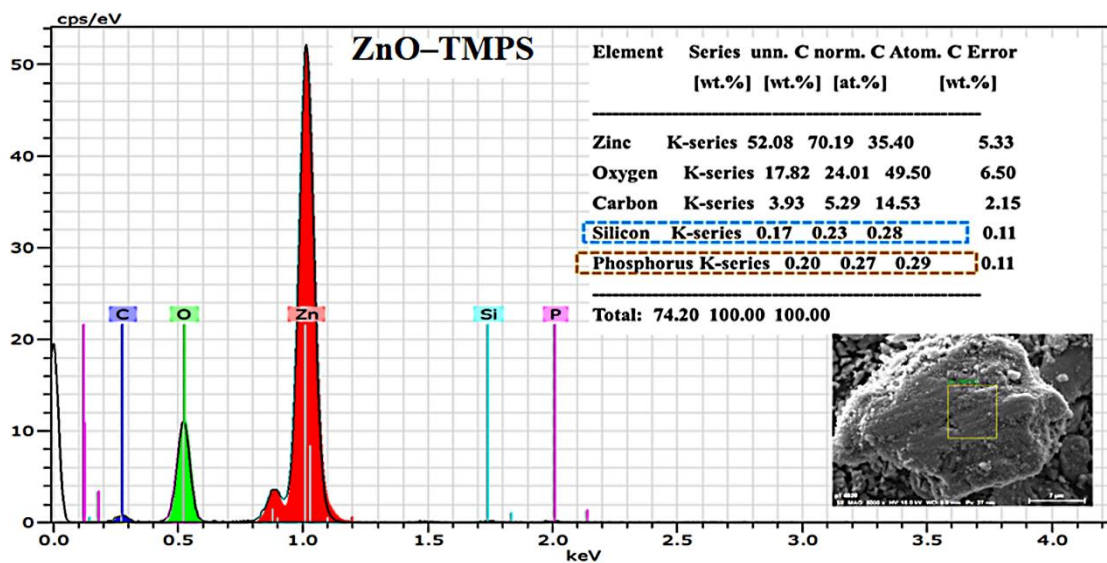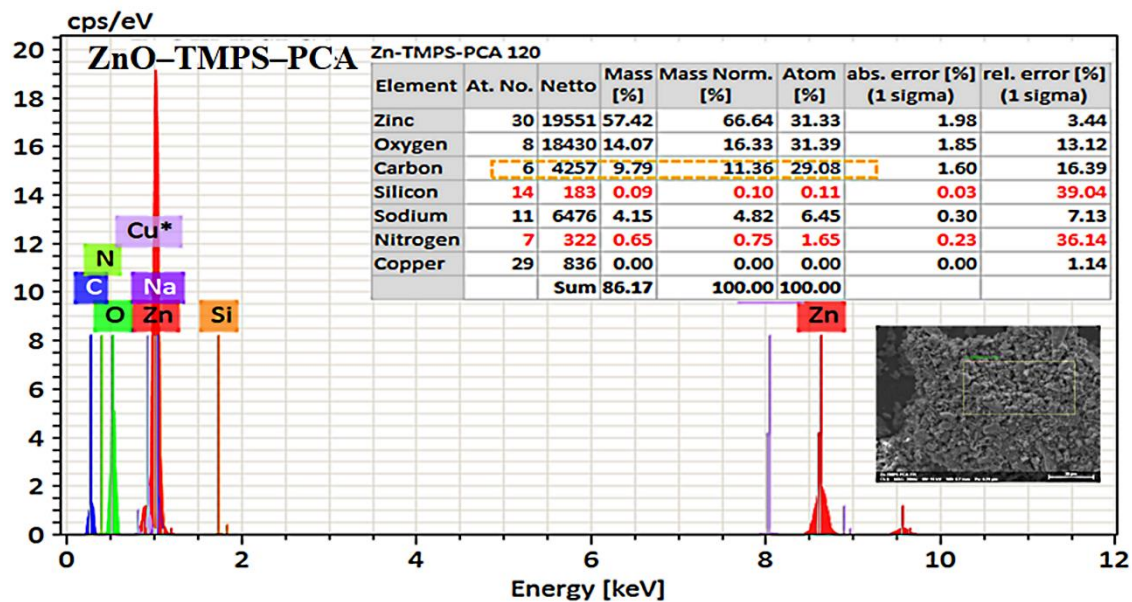

Continued



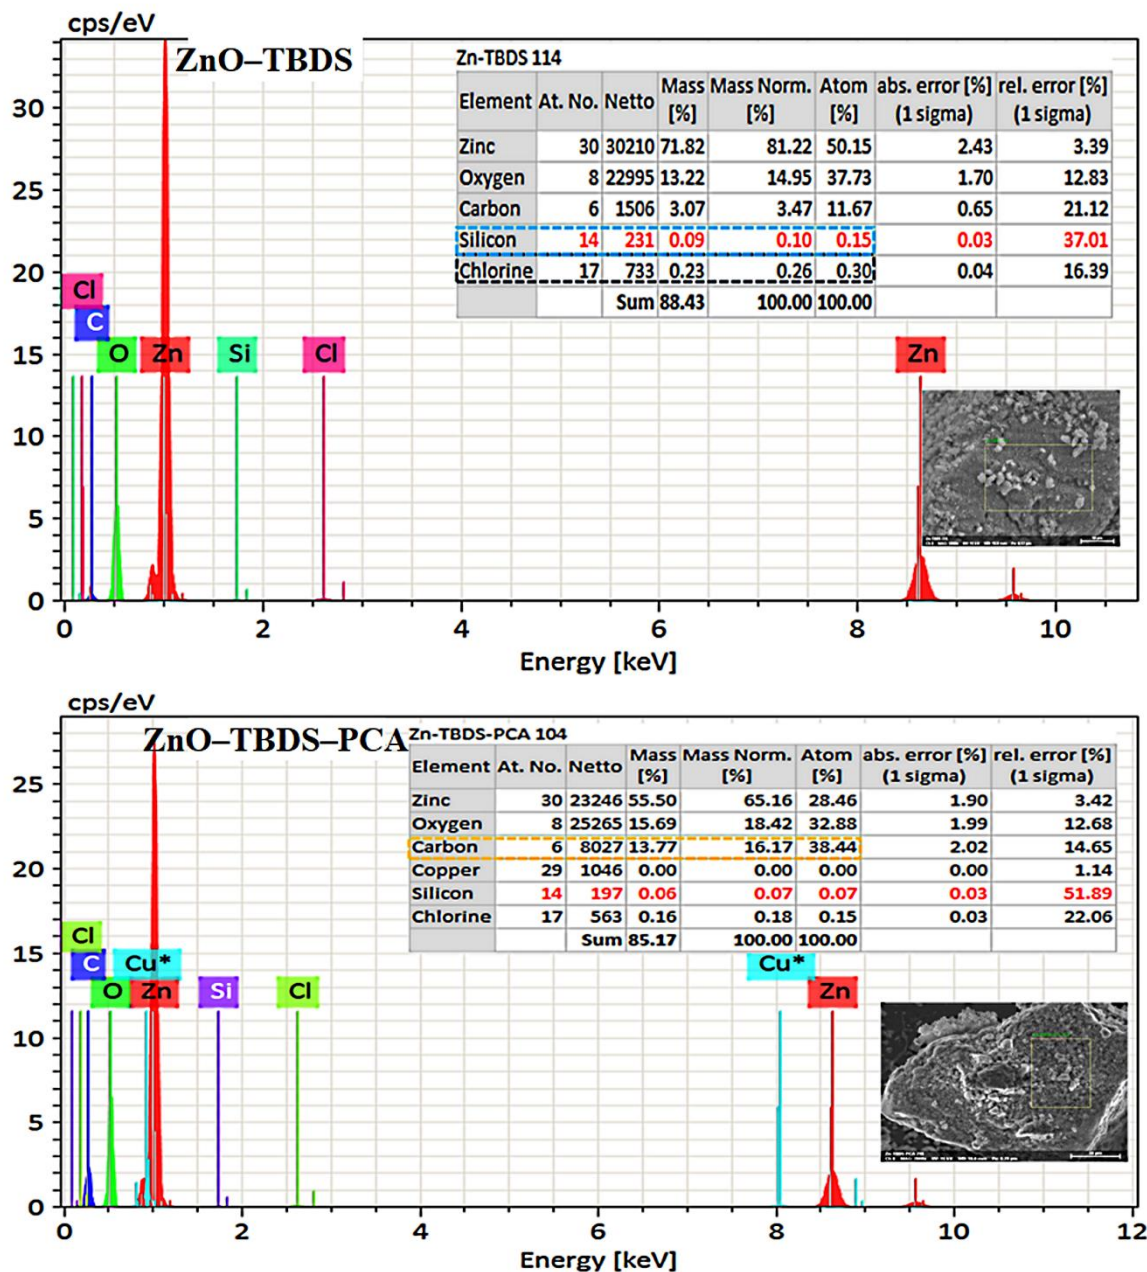

**Figure S1.** The elemental analysis by EDX of all materials at different stages of preparations. In each material, we highlighted (box) the element should be seen in order to confirm the surface modification or PCA drug loading in the nanoformulations.
